# Supplementary material for: Origin and evolution of papillomavirus (onco)genes and genomes
Source: PubMed Central journal article supplement (PMC6501903; doi:10.1098/rstb.2018.0303), 2019-04-08
Supplement: rstb20180303supp3.pdf [file rstb20180303supp3.pdf]

## Random permutations to test for common ancestry of E6 and E7.

To support the results of the Bali-Phy analyses, we performed a random permutation test as described in [de Oliveira Martins and Posada 2016](#). In this test the sequences for one of the clades are randomly shuffled and statistics are recalculated after realignment with MUSCLE ([Edgar, 2004](#)), which tells us how much the original data depart from those with phylogenetic structure partially removed. The statistics used in this test are ML tree length (sum of the branch lengths) and Log likelihood, calculated with PhyMLv3.0 ([Guindon, 2010](#)).

We performed the random permutation test on the *E6* and *E7* PV oncogenes using two different reduced data sets (RD1 and RD2). Each data set contained 35 representative species from the different PV clades in [fig. 1](#), including the seven PVs infecting Aves and Testudines (grey clade), six Alpha-Omikron PVs (red clade), six Beta-Xi PVs (green clade), six Lambda-Mu PVs (yellow clade), six Delta-Zeta PVs (blue clade), and the four PVs infecting Manatees (black clade). The analyses were performed at the amino acid level using the LG substitution model, for *E6* and *E7* separately as well as concatenated. We assumed the null hypothesis (H0) of Common Ancestry (CA).

In our data set, we reshuffled one of the groups (in this case the Alpha-Omikron PV clade) 100 times, each time realigning against the other groups in the data set. For each iteration, the alignment is always optimised and the statistics (ML tree lengths and Log likelihoods) are calculated. To make the statistics comparable, the same alignment is used for both the Independent Origin (IO) and CA hypotheses. For the Log likelihoods, the Bayes Factor is then  $\Delta\text{BF} = \log[\text{Prob}(\text{CA})] - \log[\text{Prob}(\text{IO})]$ , such that positive values favor CA and negative values indicate IO.

The results are shown in the figures on the following pages, where on each page a different data set is depicted. The ML tree lengths are always shorter for H0, favoring CA for both *E6* and *E7*. The calculated Log likelihoods and  $\Delta\text{BF}$  also indicate that CA is the best supported model. However, when comparing their distributions with a multiple comparison test after Kruskal-Wallis, the hypothesis H1: IO for *E6* and *E7* in the Aves/Testudines clade is not significantly worse. Thus, although the best scenario is common origin for all extant *E6* and *E7* genes, we cannot reject the hypothesis that *E6* and *E7* in extant PVs infecting birds and turtles have originated independently from the *E6* and *E7* genes in extant PVs infecting mammals.

# Random Permutation Test

Reduced Dataset 1: E6E7

- H0: (gray-blue-yellow-red-black-green)
- H1: gray+(blue-yellow-red-black-green)
- H2: gray+blue+(yellow-red-black-green)
- H3: gray+blue+yellow+(red-black-green)
- H4: gray+blue+yellow+red+(black-green)
- H5: gray+blue+(red-black)+(green-yellow)
- H6: gray+blue+red+black+(green-yellow)
- H7: gray+blue+yellow+red+black+green

RD1: E6E7

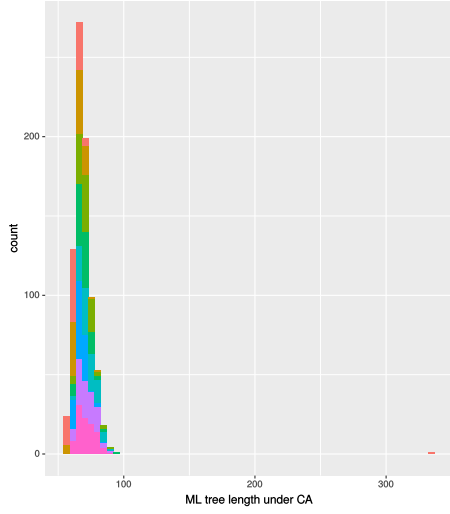

RD1: E6E7

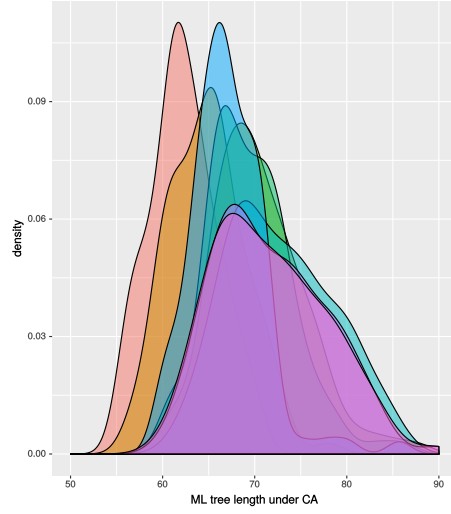

**Kruskal-Wallis rank sum test on ML tree length**  
chi-squared = 276.65, df = 7, p-value < 2.2e-16

**Multiple comparison test after Kruskal-Wallis**  
p.value: 0.05

|                 | obs.dif | critical.dif | difference |
|-----------------|---------|--------------|------------|
| tlen_H0-tlen_H1 | 93.73   | 102.0845     | FALSE      |
| tlen_H0-tlen_H2 | 330.76  | 102.0845     | TRUE       |
| tlen_H0-tlen_H3 | 296.09  | 102.0845     | TRUE       |
| tlen_H0-tlen_H4 | 405.87  | 102.0845     | TRUE       |
| tlen_H0-tlen_H5 | 187.34  | 102.0845     | TRUE       |
| tlen_H0-tlen_H6 | 361.87  | 102.0845     | TRUE       |
| tlen_H0-tlen_H7 | 357.54  | 102.0845     | TRUE       |

RD1: E6E7

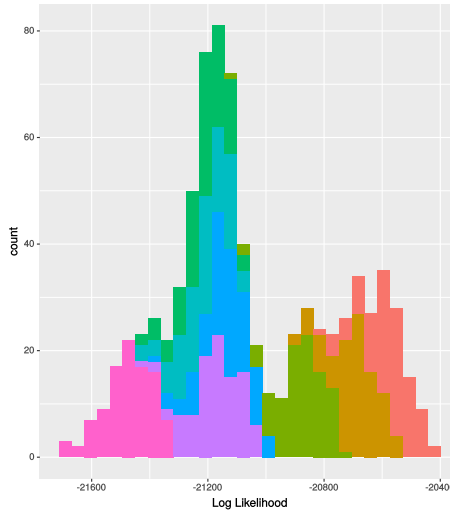

RD1: E6E7

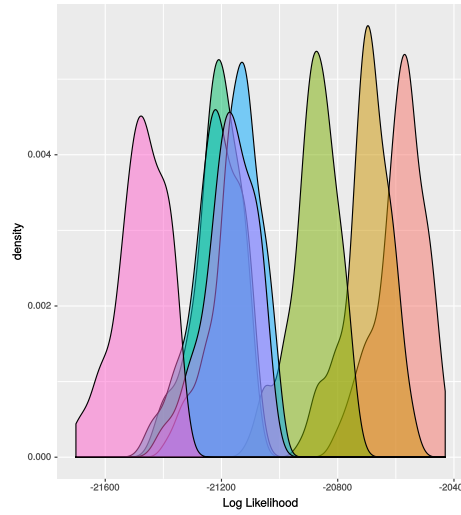

**Kruskal-Wallis rank sum test on the Log Likelihood**  
chi-squared = 694.21, df = 7, p-value < 2.2e-16

**Multiple comparison test after Kruskal-Wallis**  
p.value: 0.05

|               | obs.dif | critical.dif | difference |
|---------------|---------|--------------|------------|
| lnl_H0-lnl_H1 | 74.62   | 102.0845     | FALSE      |
| lnl_H0-lnl_H2 | 180.52  | 102.0845     | TRUE       |
| lnl_H0-lnl_H3 | 474.95  | 102.0845     | TRUE       |
| lnl_H0-lnl_H4 | 476.26  | 102.0845     | TRUE       |
| lnl_H0-lnl_H5 | 376.31  | 102.0845     | TRUE       |
| lnl_H0-lnl_H6 | 412.88  | 102.0845     | TRUE       |
| lnl_H0-lnl_H7 | 680.70  | 102.0845     | TRUE       |

RD1: E6E7

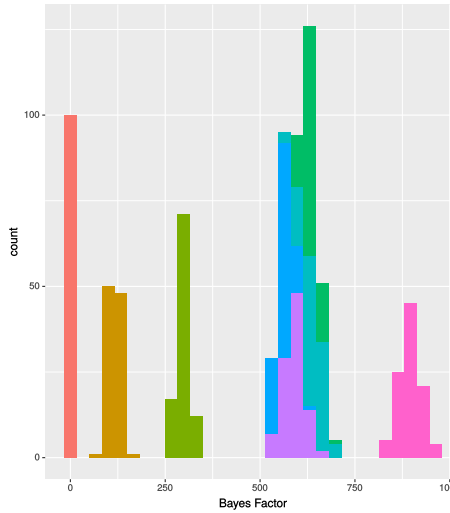

RD1: E6E7

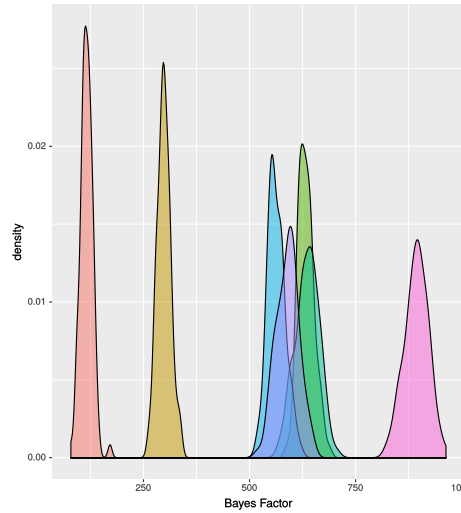

**Kruskal-Wallis rank sum test on the ΔBF**  
chi-squared = 646.23, df = 6, p-value < 2.2e-16

**Multiple comparison test after Kruskal-Wallis**  
p.value: 0.05

|             | obs.dif | critical.dif | difference |
|-------------|---------|--------------|------------|
| bf_H1-bf_H2 | 100.00  | 86.8822      | TRUE       |
| bf_H1-bf_H3 | 435.21  | 86.8822      | TRUE       |
| bf_H1-bf_H4 | 442.02  | 86.8822      | TRUE       |
| bf_H1-bf_H5 | 223.84  | 86.8822      | TRUE       |
| bf_H1-bf_H6 | 298.93  | 86.8822      | TRUE       |
| bf_H1-bf_H7 | 600.00  | 86.8822      | TRUE       |
| bf_H2-bf_H3 | 335.21  | 86.8822      | TRUE       |
| bf_H2-bf_H4 | 342.02  | 86.8822      | TRUE       |
| bf_H2-bf_H5 | 123.84  | 86.8822      | TRUE       |
| bf_H2-bf_H6 | 198.93  | 86.8822      | TRUE       |
| bf_H2-bf_H7 | 500.00  | 86.8822      | TRUE       |
| bf_H3-bf_H4 | 6.81    | 86.8822      | FALSE      |
| bf_H3-bf_H5 | 211.37  | 86.8822      | TRUE       |
| bf_H3-bf_H6 | 136.28  | 86.8822      | TRUE       |
| bf_H3-bf_H7 | 164.79  | 86.8822      | TRUE       |
| bf_H4-bf_H5 | 218.18  | 86.8822      | TRUE       |
| bf_H4-bf_H6 | 143.09  | 86.8822      | TRUE       |
| bf_H4-bf_H7 | 157.98  | 86.8822      | TRUE       |
| bf_H5-bf_H6 | 75.09   | 86.8822      | FALSE      |
| bf_H5-bf_H7 | 376.16  | 86.8822      | TRUE       |
| bf_H6-bf_H7 | 301.07  | 86.8822      | TRUE       |

# Random Permutation Test

Reduced Dataset 1: E6

- H0: (gray-blue-yellow-red-black-green)
- H1: gray+(blue-yellow-red-black-green)
- H2: gray+blue+(yellow-red-black-green)
- H3: gray+blue+yellow+(red-black-green)
- H4: gray+blue+yellow+red+(black-green)
- H5: gray+blue+(red-black)+(green-yellow)
- H6: gray+blue+red+black+(green-yellow)
- H7: gray+blue+yellow+red+black+green

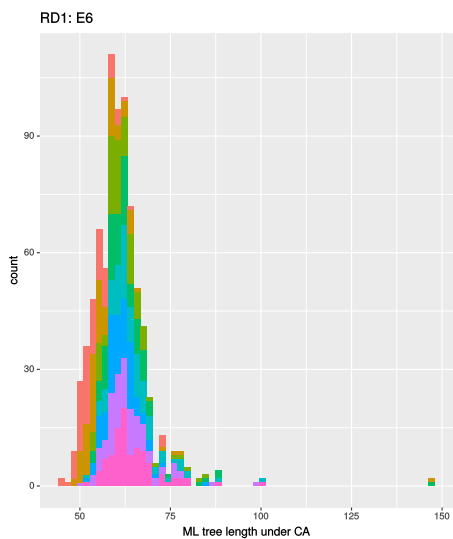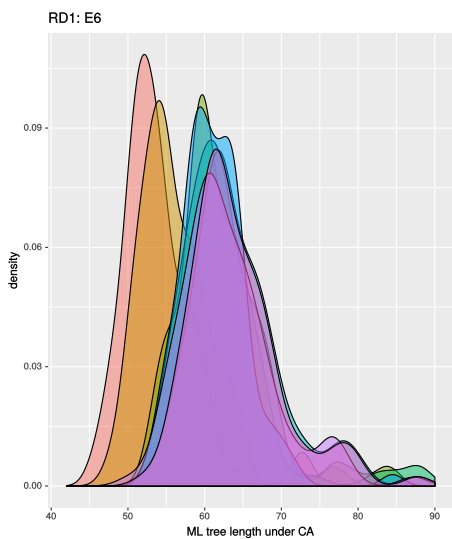

**Kruskal-Wallis rank sum test on ML tree length**  
 chi-squared = 267.71, df = 7, p-value < 2.2e-16

**Multiple comparison test after Kruskal-Wallis**  
 p.value: 0.05

|                 | obs.dif | critical.dif | difference |
|-----------------|---------|--------------|------------|
| tlen_H0-tlen_H1 | 81.97   | 102.0845     | FALSE      |
| tlen_H0-tlen_H2 | 293.32  | 102.0845     | TRUE       |
| tlen_H0-tlen_H3 | 322.51  | 102.0845     | TRUE       |
| tlen_H0-tlen_H4 | 390.28  | 102.0845     | TRUE       |
| tlen_H0-tlen_H5 | 286.30  | 102.0845     | TRUE       |
| tlen_H0-tlen_H6 | 341.05  | 102.0845     | TRUE       |
| tlen_H0-tlen_H7 | 380.17  | 102.0845     | TRUE       |

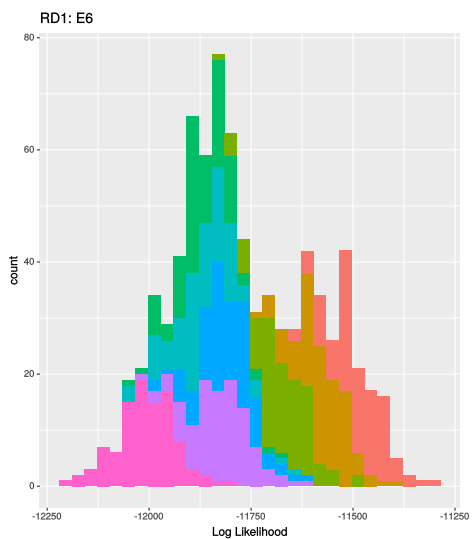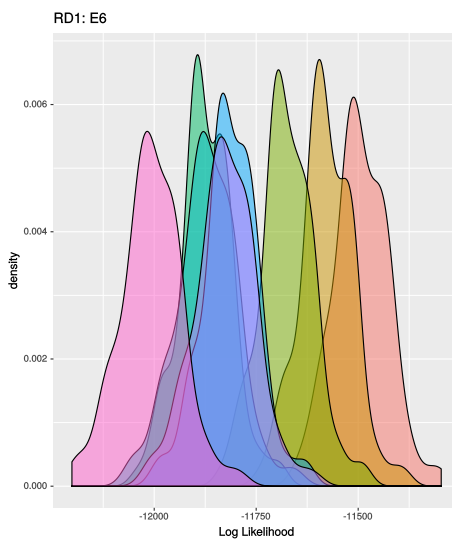

**Kruskal-Wallis rank sum test on the Log Likelihood**  
 chi-squared = 657.55, df = 7, p-value < 2.2e-16

**Multiple comparison test after Kruskal-Wallis**  
 p.value: 0.05

|               | obs.dif | critical.dif | difference |
|---------------|---------|--------------|------------|
| lnl_H0-lnl_H1 | 77.79   | 102.0845     | FALSE      |
| lnl_H0-lnl_H2 | 179.79  | 102.0845     | TRUE       |
| lnl_H0-lnl_H3 | 483.00  | 102.0845     | TRUE       |
| lnl_H0-lnl_H4 | 473.91  | 102.0845     | TRUE       |
| lnl_H0-lnl_H5 | 373.19  | 102.0845     | TRUE       |
| lnl_H0-lnl_H6 | 396.07  | 102.0845     | TRUE       |
| lnl_H0-lnl_H7 | 655.13  | 102.0845     | TRUE       |

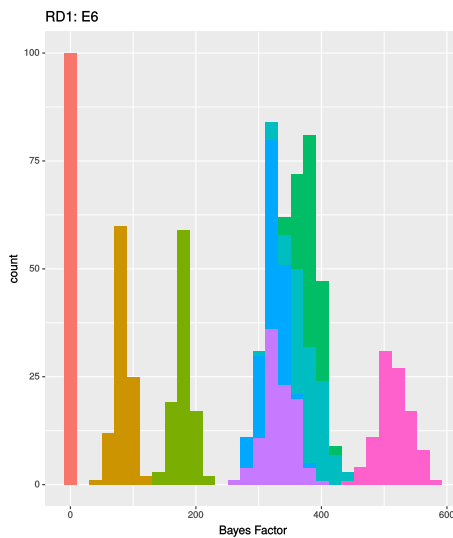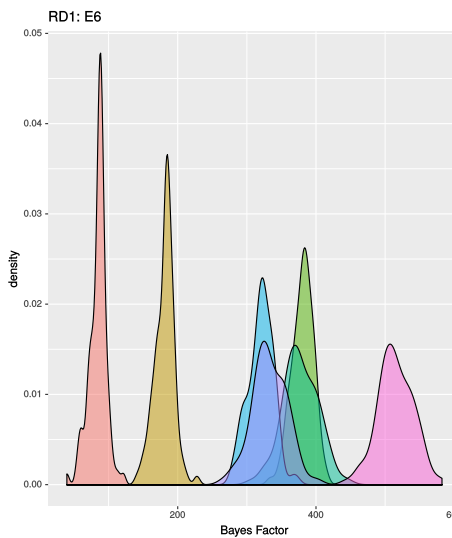

**Kruskal-Wallis rank sum test on the ΔBF**  
 chi-squared = 644.87, df = 6, p-value < 2.2e-16

**Multiple comparison test after Kruskal-Wallis**  
 p.value: 0.05

|             | obs.dif | critical.dif | difference |
|-------------|---------|--------------|------------|
| bf_H1-bf_H2 | 100.00  | 86.8822      | TRUE       |
| bf_H1-bf_H3 | 449.43  | 86.8822      | TRUE       |
| bf_H1-bf_H4 | 431.25  | 86.8822      | TRUE       |
| bf_H1-bf_H5 | 238.54  | 86.8822      | TRUE       |
| bf_H1-bf_H6 | 280.79  | 86.8822      | TRUE       |
| bf_H1-bf_H7 | 599.99  | 86.8822      | TRUE       |
| bf_H2-bf_H3 | 349.43  | 86.8822      | TRUE       |
| bf_H2-bf_H4 | 331.25  | 86.8822      | TRUE       |
| bf_H2-bf_H5 | 138.54  | 86.8822      | TRUE       |
| bf_H2-bf_H6 | 180.79  | 86.8822      | TRUE       |
| bf_H2-bf_H7 | 499.99  | 86.8822      | TRUE       |
| bf_H3-bf_H4 | 18.18   | 86.8822      | FALSE      |
| bf_H3-bf_H5 | 210.89  | 86.8822      | TRUE       |
| bf_H3-bf_H6 | 168.64  | 86.8822      | TRUE       |
| bf_H3-bf_H7 | 150.56  | 86.8822      | TRUE       |
| bf_H4-bf_H5 | 192.71  | 86.8822      | TRUE       |
| bf_H4-bf_H6 | 150.46  | 86.8822      | TRUE       |
| bf_H4-bf_H7 | 168.74  | 86.8822      | TRUE       |
| bf_H5-bf_H6 | 42.25   | 86.8822      | FALSE      |
| bf_H5-bf_H7 | 361.45  | 86.8822      | TRUE       |
| bf_H6-bf_H7 | 319.20  | 86.8822      | TRUE       |

# Random Permutation Test

Reduced Dataset 1: E7

- H0: (gray-blue-yellow-red-black-green)
- H1: gray+(blue-yellow-red-black-green)
- H2: gray+blue+(yellow-red-black-green)
- H3: gray+blue+yellow+(red-black-green)
- H4: gray+blue+yellow+red+(black-green)
- H5: gray+blue+(red-black)+(green-yellow)
- H6: gray+blue+red+black+(green-yellow)
- H7: gray+blue+yellow+red+black+green

RD1: E7

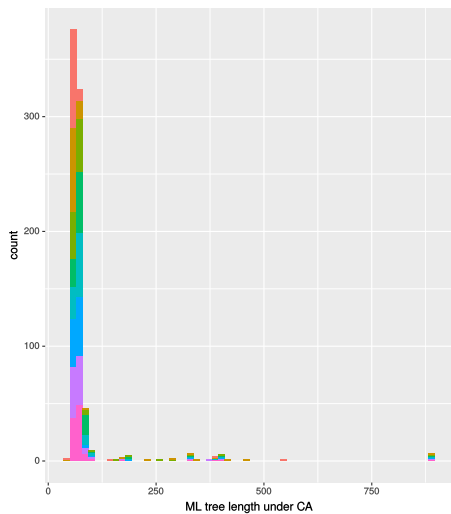

RD1: E7

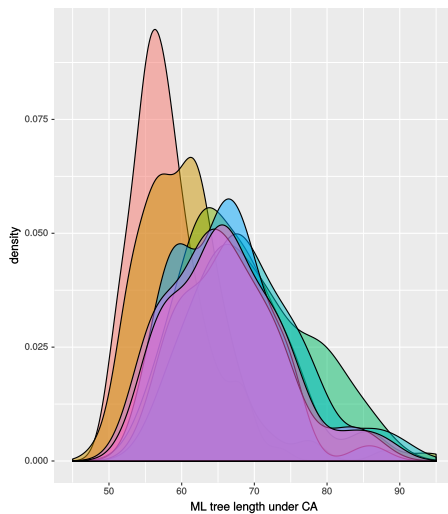

**Kruskal-Wallis rank sum test on ML tree length**  
chi-squared = 165.86, df = 7, p-value < 2.2e-16

**Multiple comparison test after Kruskal-Wallis**  
p.value: 0.05

|                 | obs.dif | critical.dif | difference |
|-----------------|---------|--------------|------------|
| tlen_H0-tlen_H1 | 97.52   | 102.0845     | FALSE      |
| tlen_H0-tlen_H2 | 269.31  | 102.0845     | TRUE       |
| tlen_H0-tlen_H3 | 335.53  | 102.0845     | TRUE       |
| tlen_H0-tlen_H4 | 308.82  | 102.0845     | TRUE       |
| tlen_H0-tlen_H5 | 227.26  | 102.0845     | TRUE       |
| tlen_H0-tlen_H6 | 234.92  | 102.0845     | TRUE       |
| tlen_H0-tlen_H7 | 256.56  | 102.0845     | TRUE       |

RD1: E7

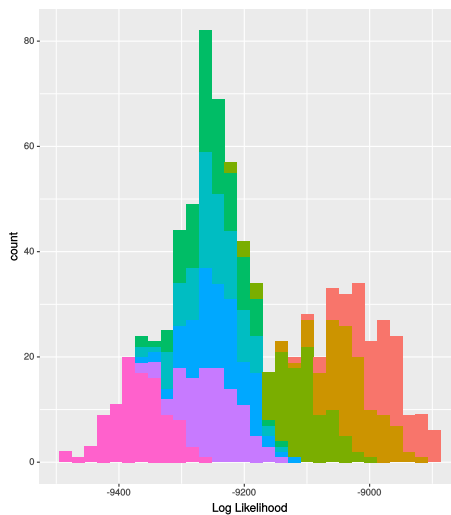

RD1: E7

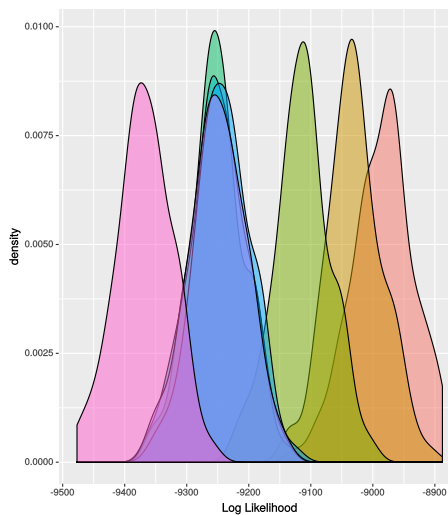

**Kruskal-Wallis rank sum test on the Log Likelihood**  
chi-squared = 665.11, df = 7, p-value < 2.2e-16

**Multiple comparison test after Kruskal-Wallis**  
p.value: 0.05

|               | obs.dif | critical.dif | difference |
|---------------|---------|--------------|------------|
| lnl_H0-lnl_H1 | 57.17   | 102.0845     | FALSE      |
| lnl_H0-lnl_H2 | 167.52  | 102.0845     | TRUE       |
| lnl_H0-lnl_H3 | 431.76  | 102.0845     | TRUE       |
| lnl_H0-lnl_H4 | 429.51  | 102.0845     | TRUE       |
| lnl_H0-lnl_H5 | 406.16  | 102.0845     | TRUE       |
| lnl_H0-lnl_H6 | 428.60  | 102.0845     | TRUE       |
| lnl_H0-lnl_H7 | 661.76  | 102.0845     | TRUE       |

RD1: E7

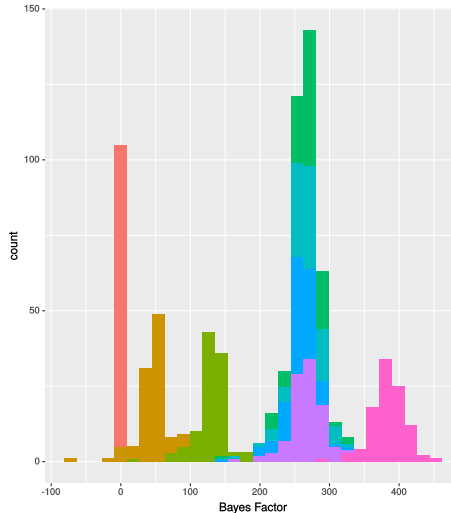

RD1: E7

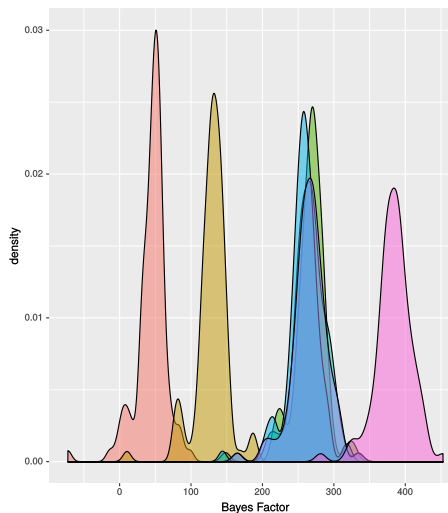

**Kruskal-Wallis rank sum test on the ΔBF**  
chi-squared = 565.76, df = 6, p-value < 2.2e-16

**Multiple comparison test after Kruskal-Wallis**  
p.value: 0.05

|             | obs.dif | critical.dif | difference |
|-------------|---------|--------------|------------|
| bf_H1-bf_H2 | 98.05   | 86.8822      | TRUE       |
| bf_H1-bf_H3 | 368.34  | 86.8822      | TRUE       |
| bf_H1-bf_H4 | 358.75  | 86.8822      | TRUE       |
| bf_H1-bf_H5 | 309.04  | 86.8822      | TRUE       |
| bf_H1-bf_H6 | 359.78  | 86.8822      | TRUE       |
| bf_H1-bf_H7 | 597.99  | 86.8822      | TRUE       |
| bf_H2-bf_H3 | 270.29  | 86.8822      | TRUE       |
| bf_H2-bf_H4 | 260.70  | 86.8822      | TRUE       |
| bf_H2-bf_H5 | 210.99  | 86.8822      | TRUE       |
| bf_H2-bf_H6 | 261.73  | 86.8822      | TRUE       |
| bf_H2-bf_H7 | 499.94  | 86.8822      | TRUE       |
| bf_H3-bf_H4 | 9.59    | 86.8822      | FALSE      |
| bf_H3-bf_H5 | 59.30   | 86.8822      | FALSE      |
| bf_H3-bf_H6 | 8.56    | 86.8822      | FALSE      |
| bf_H3-bf_H7 | 229.65  | 86.8822      | TRUE       |
| bf_H4-bf_H5 | 49.71   | 86.8822      | FALSE      |
| bf_H4-bf_H6 | 1.03    | 86.8822      | FALSE      |
| bf_H4-bf_H7 | 239.24  | 86.8822      | TRUE       |
| bf_H5-bf_H6 | 50.74   | 86.8822      | FALSE      |
| bf_H5-bf_H7 | 288.95  | 86.8822      | TRUE       |
| bf_H6-bf_H7 | 238.21  | 86.8822      | TRUE       |

# Random Permutation Test

Reduced Dataset 2: E6E7

- H0: (gray-blue-yellow-red-black-green)
- H1: gray+(blue-yellow-red-black-green)
- H2: gray+blue+(yellow-red-black-green)
- H3: gray+blue+yellow+(red-black-green)
- H4: gray+blue+yellow+red+(black-green)
- H5: gray+blue+(red-black)+(green-yellow)
- H6: gray+blue+red+black+(green-yellow)
- H7: gray+blue+yellow+red+black+green

RD2: E6E7

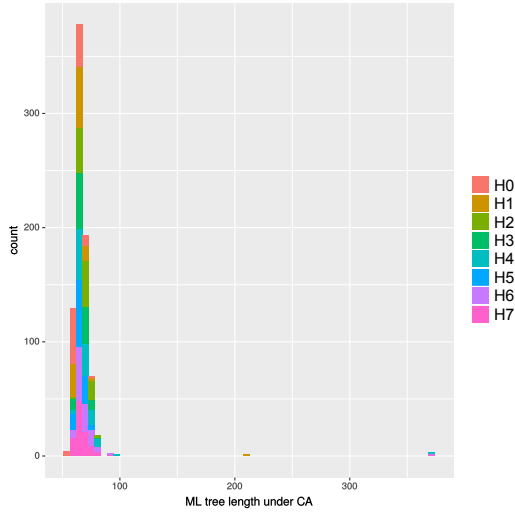

RD2: E6E7

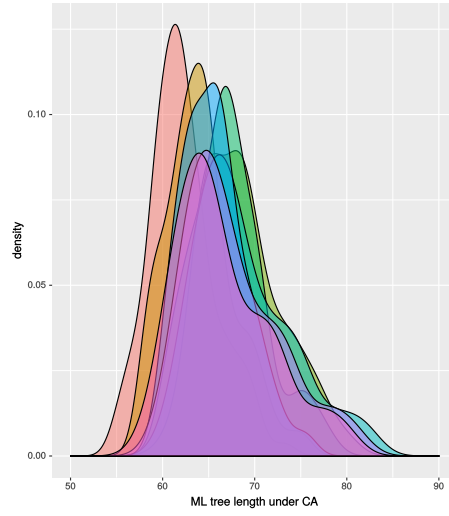

**Kruskal-Wallis rank sum test on ML tree length**  
chi-squared = 167.42, df = 7, p-value < 2.2e-16

**Multiple comparison test after Kruskal-Wallis**  
p.value: 0.05

|                 | obs.dif | critical.dif | difference |
|-----------------|---------|--------------|------------|
| tlen_H0-tlen_H1 | 101.57  | 102.0845     | FALSE      |
| tlen_H0-tlen_H2 | 328.90  | 102.0845     | TRUE       |
| tlen_H0-tlen_H3 | 263.70  | 102.0845     | TRUE       |
| tlen_H0-tlen_H4 | 320.92  | 102.0845     | TRUE       |
| tlen_H0-tlen_H5 | 180.01  | 102.0845     | TRUE       |
| tlen_H0-tlen_H6 | 267.30  | 102.0845     | TRUE       |
| tlen_H0-tlen_H7 | 216.08  | 102.0845     | TRUE       |

RD2: E6E7

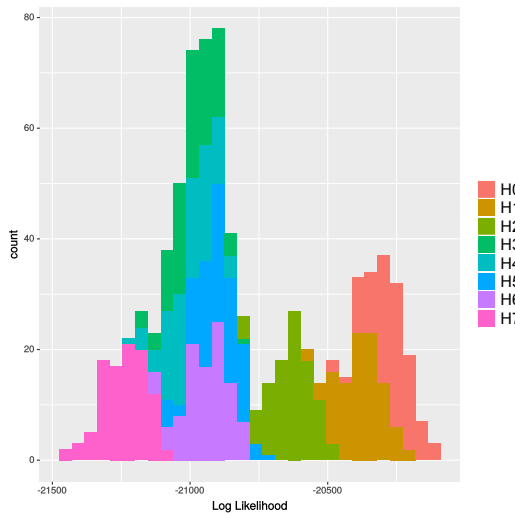

RD2: E6E7

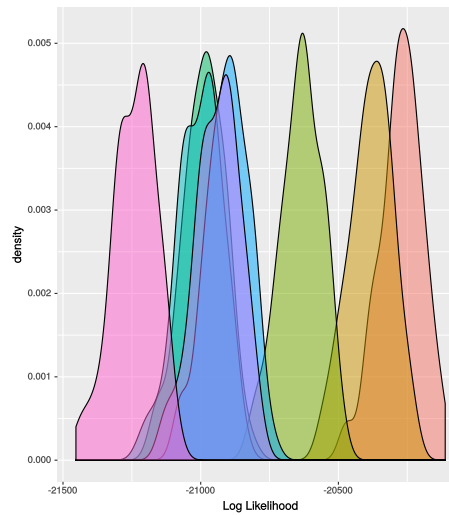

**Kruskal-Wallis rank sum test on the Log Likelihood**  
chi-squared = 705.72, df = 7, p-value < 2.2e-16

**Multiple comparison test after Kruskal-Wallis**  
p.value: 0.05

|               | obs.dif | critical.dif | difference |
|---------------|---------|--------------|------------|
| lnl_H0-lnl_H1 | 68.72   | 102.0845     | FALSE      |
| lnl_H0-lnl_H2 | 183.82  | 102.0845     | TRUE       |
| lnl_H0-lnl_H3 | 475.45  | 102.0845     | TRUE       |
| lnl_H0-lnl_H4 | 494.20  | 102.0845     | TRUE       |
| lnl_H0-lnl_H5 | 360.52  | 102.0845     | TRUE       |
| lnl_H0-lnl_H6 | 407.66  | 102.0845     | TRUE       |
| lnl_H0-lnl_H7 | 681.23  | 102.0845     | TRUE       |

RD2: E6E7

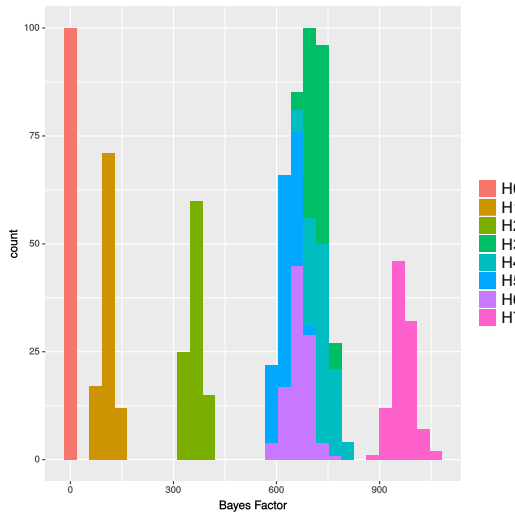

RD2: E6E7

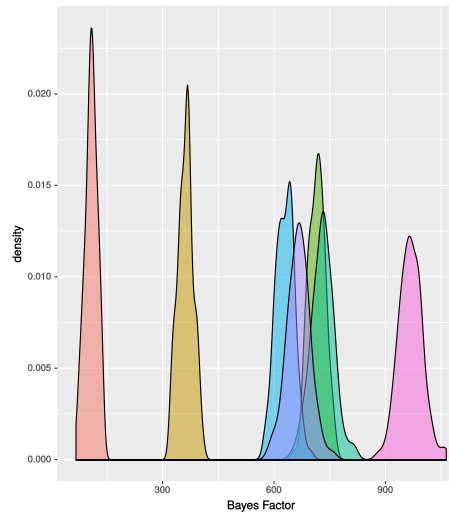

**Kruskal-Wallis rank sum test on the ΔBF**  
chi-squared = 654.07, df = 6, p-value < 2.2e-16

**Multiple comparison test after Kruskal-Wallis**  
p.value: 0.05

|             | obs.dif | critical.dif | difference |
|-------------|---------|--------------|------------|
| bf_H1-bf_H2 | 100.00  | 86.8822      | TRUE       |
| bf_H1-bf_H3 | 423.75  | 86.8822      | TRUE       |
| bf_H1-bf_H4 | 459.52  | 86.8822      | TRUE       |
| bf_H1-bf_H5 | 218.17  | 86.8822      | TRUE       |
| bf_H1-bf_H6 | 298.56  | 86.8822      | TRUE       |
| bf_H1-bf_H7 | 600.00  | 86.8822      | TRUE       |
| bf_H2-bf_H3 | 323.75  | 86.8822      | TRUE       |
| bf_H2-bf_H4 | 359.52  | 86.8822      | TRUE       |
| bf_H2-bf_H5 | 118.17  | 86.8822      | TRUE       |
| bf_H2-bf_H6 | 198.56  | 86.8822      | TRUE       |
| bf_H2-bf_H7 | 500.00  | 86.8822      | TRUE       |
| bf_H3-bf_H4 | 35.77   | 86.8822      | FALSE      |
| bf_H3-bf_H5 | 205.58  | 86.8822      | TRUE       |
| bf_H3-bf_H6 | 125.19  | 86.8822      | TRUE       |
| bf_H3-bf_H7 | 176.25  | 86.8822      | TRUE       |
| bf_H4-bf_H5 | 241.35  | 86.8822      | TRUE       |
| bf_H4-bf_H6 | 160.96  | 86.8822      | TRUE       |
| bf_H4-bf_H7 | 140.48  | 86.8822      | TRUE       |
| bf_H5-bf_H6 | 80.39   | 86.8822      | FALSE      |
| bf_H5-bf_H7 | 381.83  | 86.8822      | TRUE       |
| bf_H6-bf_H7 | 301.44  | 86.8822      | TRUE       |

# Random Permutation Test

## Reduced Dataset 2: E6

- H0: (gray-blue-yellow-red-black-green)
- H1: gray+(blue-yellow-red-black-green)
- H2: gray+blue+(yellow-red-black-green)
- H3: gray+blue+yellow+(red-black-green)
- H4: gray+blue+yellow+red+(black-green)
- H5: gray+blue+(red-black)+(green-yellow)
- H6: gray+blue+red+black+(green-yellow)
- H7: gray+blue+yellow+red+black+green

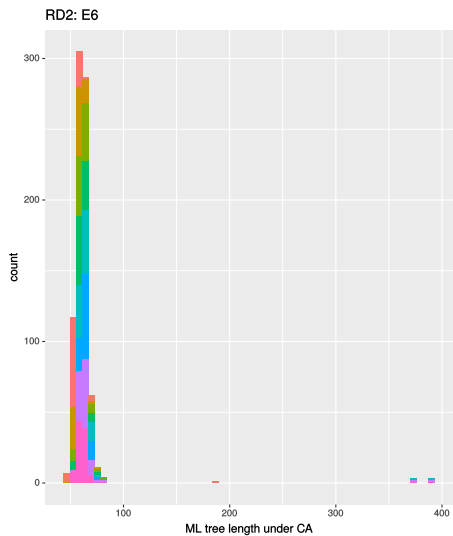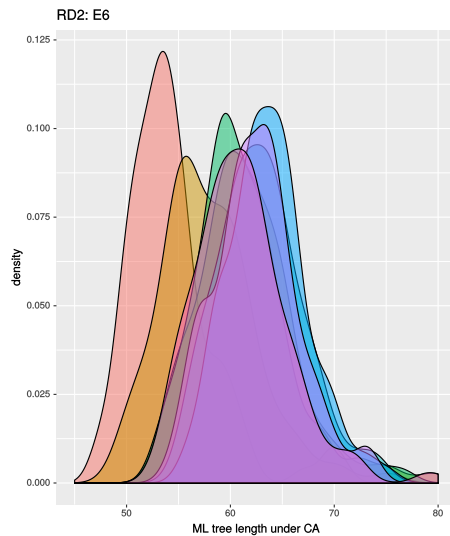

**Kruskal-Wallis rank sum test on ML tree length**  
chi-squared = 245.99, df = 7, p-value < 2.2e-16

**Multiple comparison test after Kruskal-Wallis**  
p.value: 0.05

|                 | obs.dif | critical.dif | difference |
|-----------------|---------|--------------|------------|
| tlen_H0-tlen_H1 | 127.82  | 102.0845     | TRUE       |
| tlen_H0-tlen_H2 | 298.49  | 102.0845     | TRUE       |
| tlen_H0-tlen_H3 | 272.81  | 102.0845     | TRUE       |
| tlen_H0-tlen_H4 | 376.16  | 102.0845     | TRUE       |
| tlen_H0-tlen_H5 | 404.37  | 102.0845     | TRUE       |
| tlen_H0-tlen_H6 | 359.76  | 102.0845     | TRUE       |
| tlen_H0-tlen_H7 | 284.35  | 102.0845     | TRUE       |

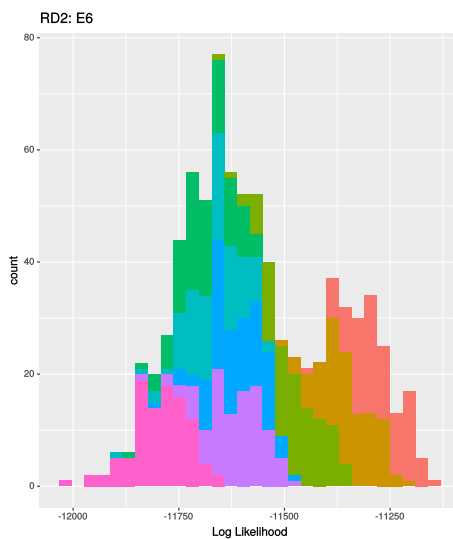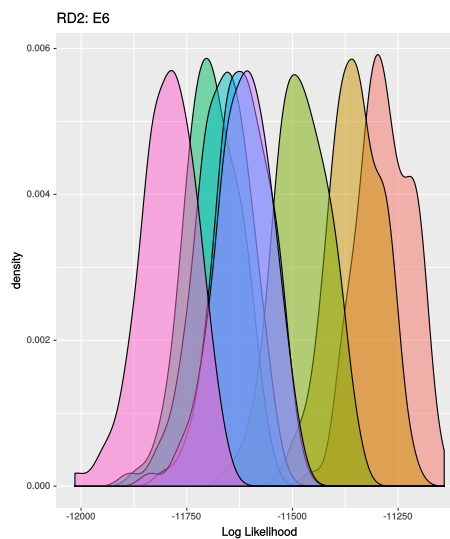

**Kruskal-Wallis rank sum test on the Log Likelihood**  
chi-squared = 672.47, df = 7, p-value < 2.2e-16

**Multiple comparison test after Kruskal-Wallis**  
p.value: 0.05

|               | obs.dif | critical.dif | difference |
|---------------|---------|--------------|------------|
| lnl_H0-lnl_H1 | 62.68   | 102.0845     | FALSE      |
| lnl_H0-lnl_H2 | 181.64  | 102.0845     | TRUE       |
| lnl_H0-lnl_H3 | 508.34  | 102.0845     | TRUE       |
| lnl_H0-lnl_H4 | 464.06  | 102.0845     | TRUE       |
| lnl_H0-lnl_H5 | 373.04  | 102.0845     | TRUE       |
| lnl_H0-lnl_H6 | 373.03  | 102.0845     | TRUE       |
| lnl_H0-lnl_H7 | 651.45  | 102.0845     | TRUE       |

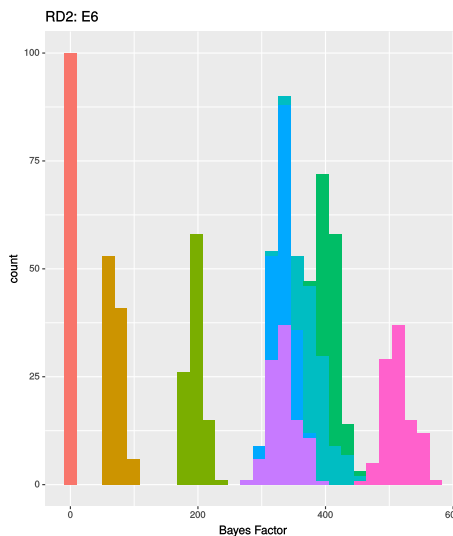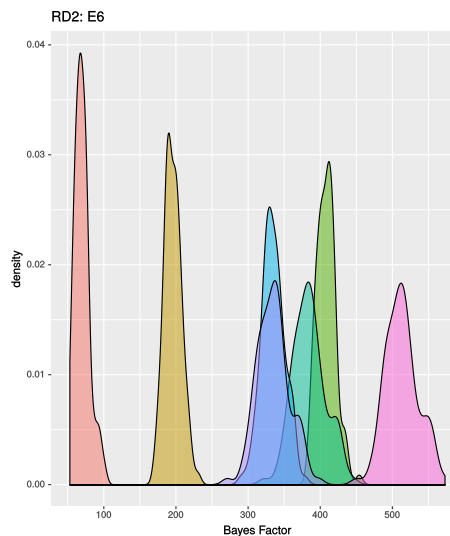

**Kruskal-Wallis rank sum test on the ΔBF**  
chi-squared = 658.24, df = 6, p-value < 2.2e-16

**Multiple comparison test after Kruskal-Wallis**  
p.value: 0.05

|             | obs.dif | critical.dif | difference |
|-------------|---------|--------------|------------|
| bf_H1-bf_H2 | 100.00  | 86.8822      | TRUE       |
| bf_H1-bf_H3 | 481.73  | 86.8822      | TRUE       |
| bf_H1-bf_H4 | 409.48  | 86.8822      | TRUE       |
| bf_H1-bf_H5 | 253.42  | 86.8822      | TRUE       |
| bf_H1-bf_H6 | 255.38  | 86.8822      | TRUE       |
| bf_H1-bf_H7 | 599.99  | 86.8822      | TRUE       |
| bf_H2-bf_H3 | 381.73  | 86.8822      | TRUE       |
| bf_H2-bf_H4 | 309.48  | 86.8822      | TRUE       |
| bf_H2-bf_H5 | 153.42  | 86.8822      | TRUE       |
| bf_H2-bf_H6 | 155.38  | 86.8822      | TRUE       |
| bf_H2-bf_H7 | 499.99  | 86.8822      | TRUE       |
| bf_H3-bf_H4 | 72.25   | 86.8822      | FALSE      |
| bf_H3-bf_H5 | 228.31  | 86.8822      | TRUE       |
| bf_H3-bf_H6 | 226.35  | 86.8822      | TRUE       |
| bf_H3-bf_H7 | 118.26  | 86.8822      | TRUE       |
| bf_H4-bf_H5 | 156.06  | 86.8822      | TRUE       |
| bf_H4-bf_H6 | 154.10  | 86.8822      | TRUE       |
| bf_H4-bf_H7 | 190.51  | 86.8822      | TRUE       |
| bf_H5-bf_H6 | 1.96    | 86.8822      | FALSE      |
| bf_H5-bf_H7 | 346.57  | 86.8822      | TRUE       |
| bf_H6-bf_H7 | 344.61  | 86.8822      | TRUE       |

# Random Permutation Test

Reduced Dataset 2: E7

- H0: (gray-blue-yellow-red-black-green)
- H1: gray+(blue-yellow-red-black-green)
- H2: gray+blue+(yellow-red-black-green)
- H3: gray+blue+yellow+(red-black-green)
- H4: gray+blue+yellow+red+(black-green)
- H5: gray+blue+(red-black)+(green-yellow)
- H6: gray+blue+red+black+(green-yellow)
- H7: gray+blue+yellow+red+black+green

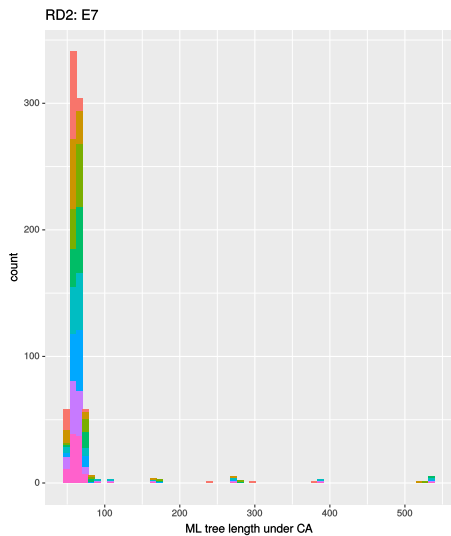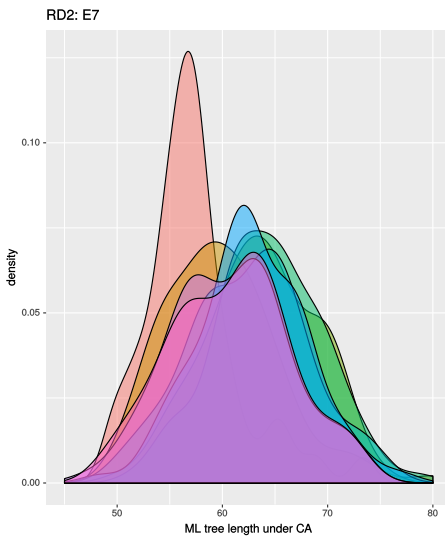

**Kruskal-Wallis rank sum test on ML tree length**  
chi-squared = 110.41, df = 7, p-value < 2.2e-16

**Multiple comparison test after Kruskal-Wallis**  
p.value: 0.05

|                 | obs.dif | critical.dif | difference |
|-----------------|---------|--------------|------------|
| tlen_H0-tlen_H1 | 100.82  | 102.0845     | FALSE      |
| tlen_H0-tlen_H2 | 258.38  | 102.0845     | TRUE       |
| tlen_H0-tlen_H3 | 278.32  | 102.0845     | TRUE       |
| tlen_H0-tlen_H4 | 220.37  | 102.0845     | TRUE       |
| tlen_H0-tlen_H5 | 224.17  | 102.0845     | TRUE       |
| tlen_H0-tlen_H6 | 154.42  | 102.0845     | TRUE       |
| tlen_H0-tlen_H7 | 157.36  | 102.0845     | TRUE       |

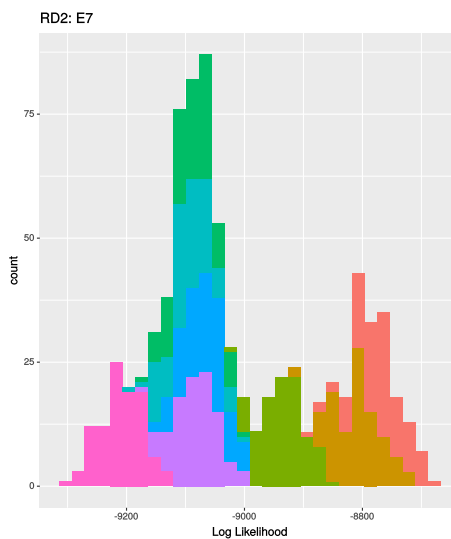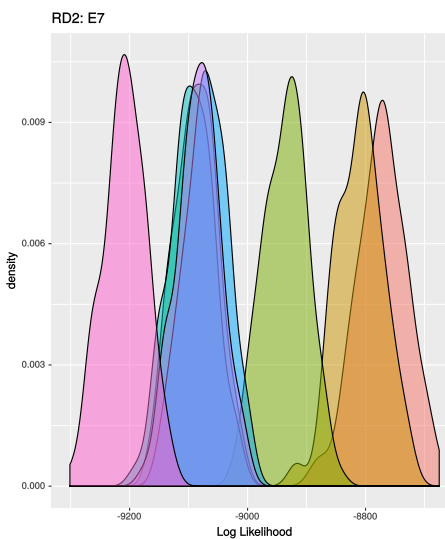

**Kruskal-Wallis rank sum test on the Log Likelihood**  
chi-squared = 688.43, df = 7, p-value < 2.2e-16

**Multiple comparison test after Kruskal-Wallis**  
p.value: 0.05

|               | obs.dif | critical.dif | difference |
|---------------|---------|--------------|------------|
| lnl_H0-lnl_H1 | 49.38   | 102.0845     | FALSE      |
| lnl_H0-lnl_H2 | 173.36  | 102.0845     | TRUE       |
| lnl_H0-lnl_H3 | 436.45  | 102.0845     | TRUE       |
| lnl_H0-lnl_H4 | 459.10  | 102.0845     | TRUE       |
| lnl_H0-lnl_H5 | 381.42  | 102.0845     | TRUE       |
| lnl_H0-lnl_H6 | 421.58  | 102.0845     | TRUE       |
| lnl_H0-lnl_H7 | 671.59  | 102.0845     | TRUE       |

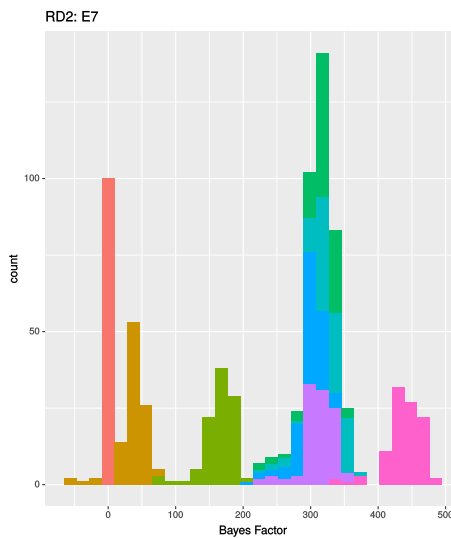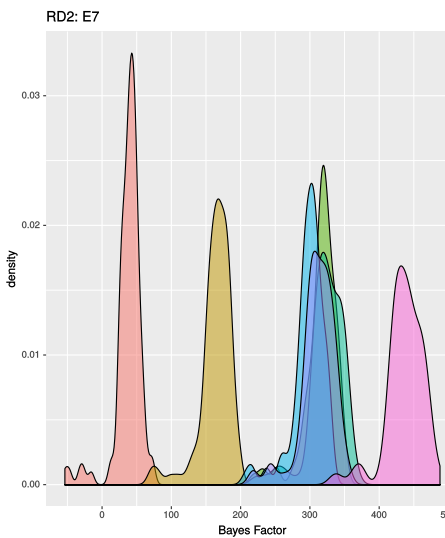

**Kruskal-Wallis rank sum test on the ΔBF**  
chi-squared = 565.76, df = 6, p-value < 2.2e-16

**Multiple comparison test after Kruskal-Wallis**  
p.value: 0.05

|             | obs.dif | critical.dif | difference |
|-------------|---------|--------------|------------|
| bf_H1-bf_H2 | 99.96   | 86.8822      | TRUE       |
| bf_H1-bf_H3 | 373.27  | 86.8822      | TRUE       |
| bf_H1-bf_H4 | 410.86  | 86.8822      | TRUE       |
| bf_H1-bf_H5 | 271.96  | 86.8822      | TRUE       |
| bf_H1-bf_H6 | 344.92  | 86.8822      | TRUE       |
| bf_H1-bf_H7 | 598.89  | 86.8822      | TRUE       |
| bf_H2-bf_H3 | 273.31  | 86.8822      | TRUE       |
| bf_H2-bf_H4 | 310.90  | 86.8822      | TRUE       |
| bf_H2-bf_H5 | 172.00  | 86.8822      | TRUE       |
| bf_H2-bf_H6 | 244.96  | 86.8822      | TRUE       |
| bf_H2-bf_H7 | 498.93  | 86.8822      | TRUE       |
| bf_H3-bf_H4 | 37.59   | 86.8822      | FALSE      |
| bf_H3-bf_H5 | 101.31  | 86.8822      | TRUE       |
| bf_H3-bf_H6 | 28.35   | 86.8822      | FALSE      |
| bf_H3-bf_H7 | 225.62  | 86.8822      | TRUE       |
| bf_H4-bf_H5 | 138.90  | 86.8822      | TRUE       |
| bf_H4-bf_H6 | 65.94   | 86.8822      | FALSE      |
| bf_H4-bf_H7 | 188.03  | 86.8822      | TRUE       |
| bf_H5-bf_H6 | 72.96   | 86.8822      | FALSE      |
| bf_H5-bf_H7 | 326.93  | 86.8822      | TRUE       |
| bf_H6-bf_H7 | 253.97  | 86.8822      | TRUE       |
